# Supplementary material
Source: PubMed Central journal article supplement (PMC5897613)
Supplement: rsbl20180006supp1.pdf [file rsbl20180006supp1.pdf]

## Supplementary files

### **Cationic antimicrobial peptides do not change recombination frequency in *Escherichia coli***

Alexandro Rodríguez-Rojas<sup>1\*</sup>, Javier Moreno-Morales<sup>1</sup>, A. James Mason<sup>2</sup> and Jens Rolff<sup>1</sup>

<sup>1</sup>Evolutionary Biology, Institut für Biologie, Freie Universität Berlin, Berlin, Germany

<sup>2</sup>Institute of Pharmaceutical Science, King's College London, Franklin-Wilkins Building, 150 Stamford Street, London, SE1 9NH, United Kingdom

\*Correspondence: ARR, [a.rojas@fu-berlin.de](mailto:a.rojas@fu-berlin.de)

Table S1. Minimal inhibitory concentrations (MIC) values for *E. coli* MG1655 for different antimicrobials used in this work.

| <b>Antibiotic/AMPs</b> | <b>MIC (<math>\mu\text{g/ml}</math>)</b> |
|------------------------|------------------------------------------|
| Ciprofloxacin          | 0.125                                    |
| Cecropin A             | 8                                        |
| LL-37                  | 8                                        |
| Melittin               | 2                                        |
| Magainin II            | 64                                       |
| Pexiganan              | 2                                        |
| Human serum            | 5875*                                    |

\* Serum concentration was calculated taking into account the total protein concentration in the used pool from Sigma Aldrich (47 mg/ml).

Table S2. Fold-change in the minimal inhibitory concentration of antimicrobial peptides due to overexpression of RpoE.

| <b>Antimicrobial peptide</b> | <b>Fold-change in MIC<br/>MG1655 pCA24N+0.1mM IPTG</b> | <b>Fold-change in MIC<br/>MG1655 pCA24N-rpoE+0.1mM IPTG</b> |
|------------------------------|--------------------------------------------------------|-------------------------------------------------------------|
| Cecropin A                   | 1                                                      | 1                                                           |
| LL-37                        | 1                                                      | 2                                                           |
| Melittin                     | 1                                                      | 1                                                           |
| Magainin II                  | 1                                                      | 2                                                           |
| Pexiganan                    | 1                                                      | 2                                                           |
| Human serum                  | 1                                                      | 2                                                           |

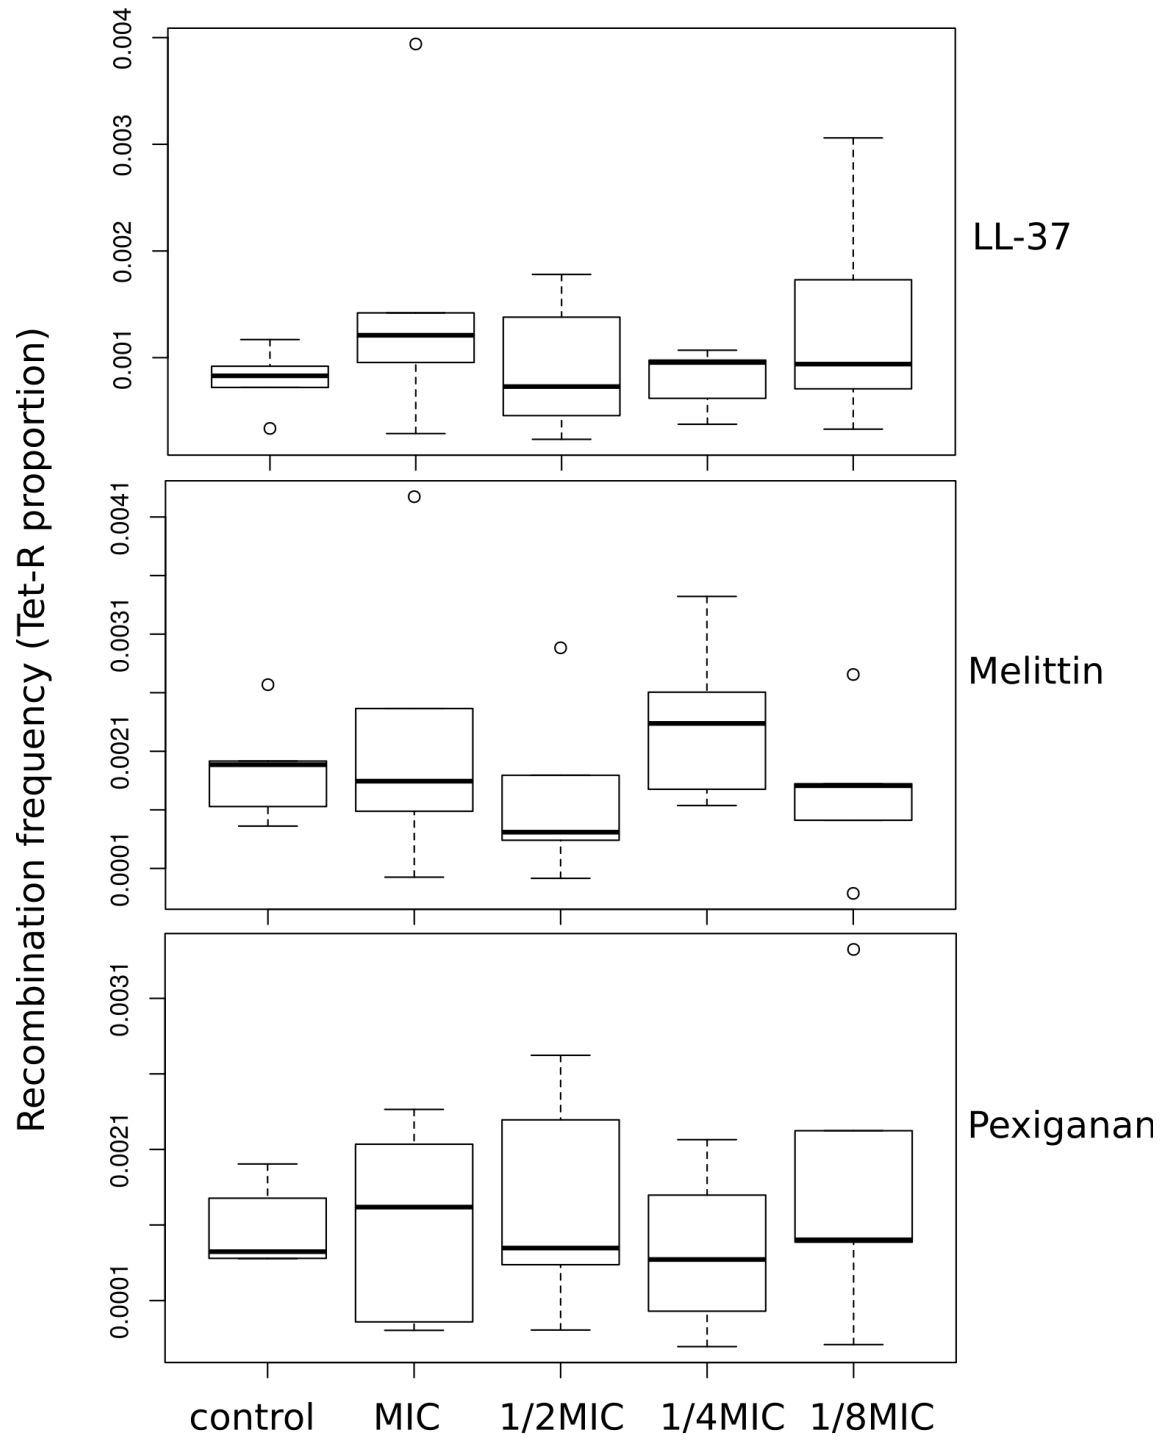

Figure S1.

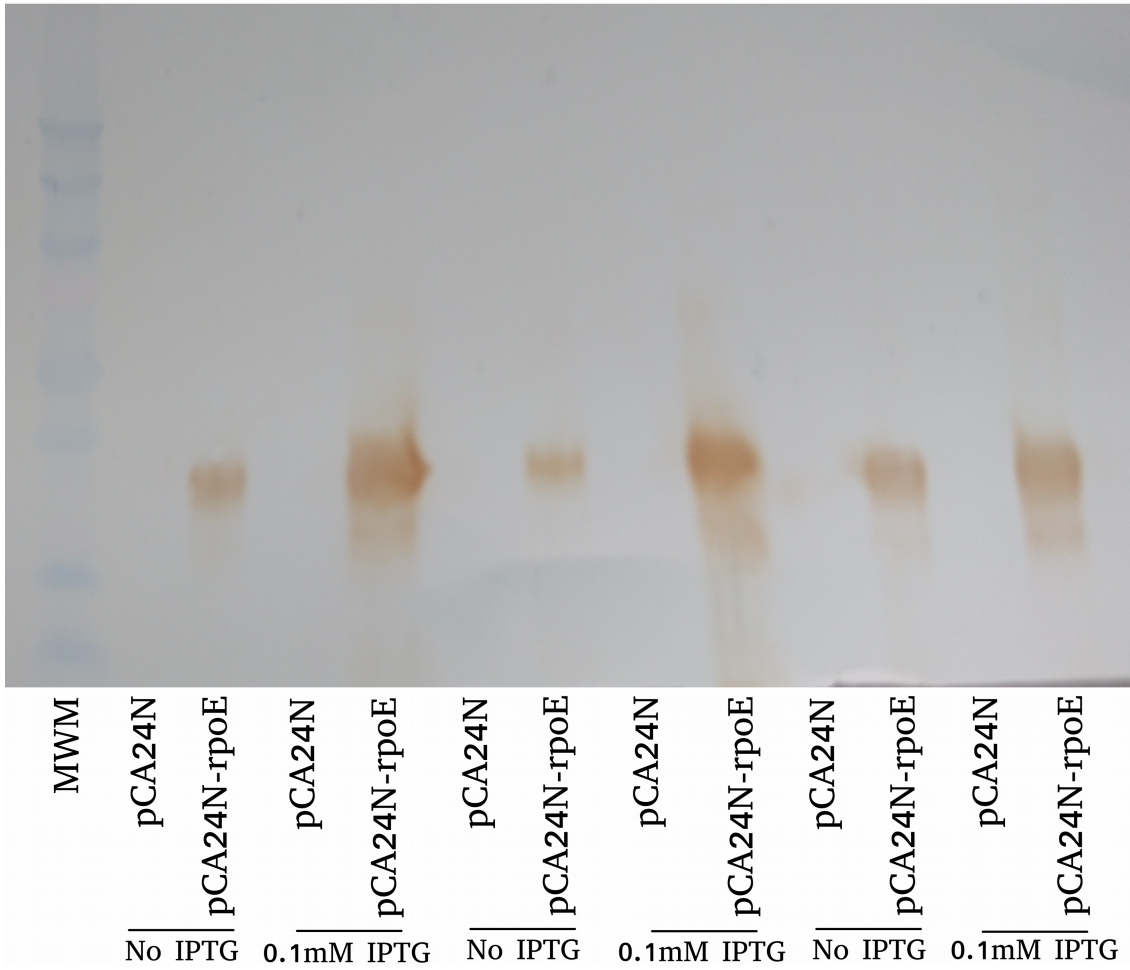

Figure S2.

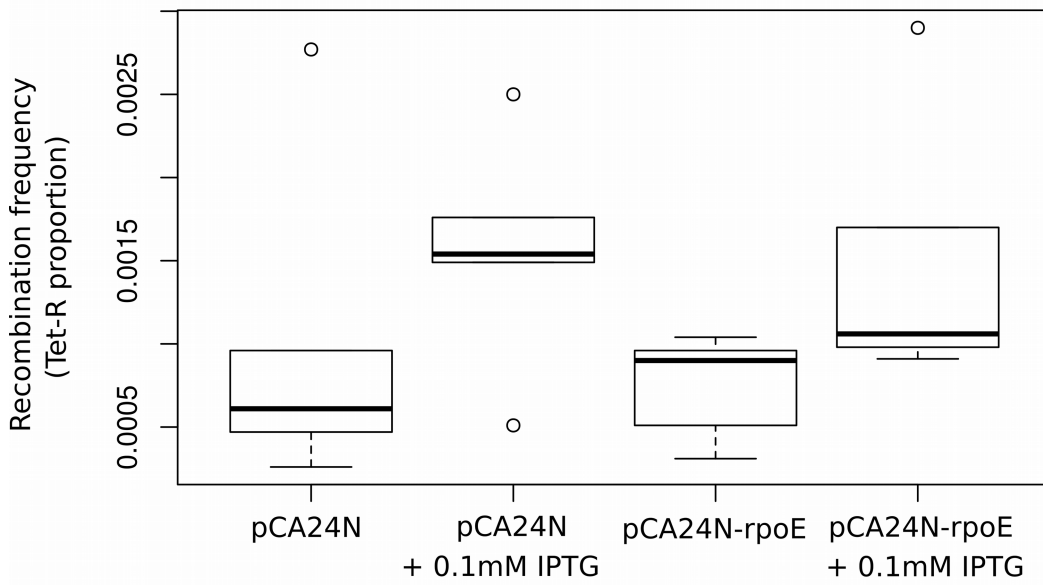

Figure S3.
